# Supplementary material for: Three-dimensional nanohybrids of Mn3O4/ordered mesoporous carbons for high performance anode materials for lithium-ion batteries
Source: Royal Society of Chemistry journal article supplement (doi:10.1039/c2jm33195k), 2012-01-01
Supplement: c2jm33195k.pdf [file c2jm33195k.pdf]

## Supporting information

### Three-Dimensional Nanohybrids of $\text{Mn}_3\text{O}_4$ /Ordered Mesoporous Carbons for High Performance Anode Materials for Lithium-Ion Batteries

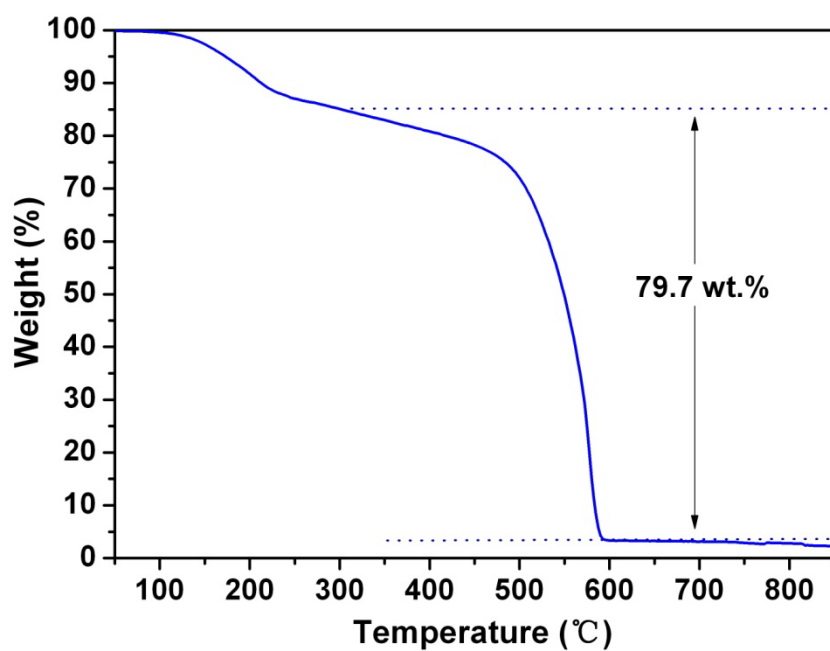

Figure S1. Thermogravimetric analysis (TGA) indicates that the weight content of  $\text{Mn}_3\text{O}_4$  in the  $\text{Mn}_3\text{O}_4$ /OMC hybrid is 20.3 wt.%.
